# Supplementary material for: Benefits of crowd-sourced GPS information for modelling the recreation ecosystem service
Source: PLOS journal article supplement (doi:10.1371/journal.pone.0202645), 2018-10-15

## General profile

Where do you live?

- DEPARTEMENT - ▼

- COMMUNE - ▼

What is your main professional activity? (from French Classification of Occupations)

- ☐ Farmer
- ☐ Craft or trade worker, entrepreneur
- ☐ Business manager
- ☐ Employee, office clerk
- ☐ Plant or machine operator, assembler
- ☐ Intermediate profession
- ☐ Retired
- ☐ Student
- ☐ Other, without any professional activity

What is your age category?

- AGE - ▼

## Recreation profile

Which outdoor sports do you practice? (Multiple choices accepted)

- |                                                 |                                                                 |
|-------------------------------------------------|-----------------------------------------------------------------|
| <input type="checkbox"/> Mountaineering         | <input type="checkbox"/> Caving                                 |
| <input type="checkbox"/> Canyoning              | <input type="checkbox"/> Skiing (alpine, cross-country, nordic) |
| <input type="checkbox"/> Cycling                | <input type="checkbox"/> Nautical sports                        |
| <input type="checkbox"/> Climbing               | <input type="checkbox"/> Trail running                          |
| <input type="checkbox"/> Jogging                | <input type="checkbox"/> Paragliding                            |
| <input type="checkbox"/> Ski touring            | <input type="checkbox"/> Mountain-biking                        |
| <input type="checkbox"/> Snowshoe hiking        | <input type="checkbox"/> Other (specify) <input type="text"/>   |
| <input type="checkbox"/> Horse riding (outdoor) |                                                                 |
| <input type="checkbox"/> Hiking (pedestrian)    |                                                                 |

**Which outdoor leisure activity do you practice? (Multiple choices accepted )**

- |                                                            |                                     |
|------------------------------------------------------------|-------------------------------------|
| <input type="checkbox"/> Art (photography, painting, etc.) | <input type="checkbox"/> Naturalism |
| <input type="checkbox"/> Swimming                          | <input type="checkbox"/> Fishing    |
| <input type="checkbox"/> Hand-picking                      | <input type="checkbox"/> Strolling  |
| <input type="checkbox"/> Détente au bord de l'eau          |                                     |

**What is your frequency of practice, all activities considered?**

- ☐ Three times a week or more
- ☐ Once a week or more
- ☐ Once a month or more
- ☐ Once every three month or more

**You practice mostly:**

- |                                         |                                    |
|-----------------------------------------|------------------------------------|
| <input type="radio"/> On your own       | <input type="radio"/> With family  |
| <input type="radio"/> Within a club     | <input type="radio"/> With friends |
| <input type="radio"/> With your partner |                                    |

**Do your practices vary between week days and week-ends?**

- |                           |                          |
|---------------------------|--------------------------|
| <input type="radio"/> Yes | <input type="radio"/> No |
|---------------------------|--------------------------|

**If positive, how? (multiple choices accepted)**

- ☐ I practice different activities
- ☐ I stay close to home during week days and go farer during weekends
- ☐ I practice on my own during week days and with relatives during weekends

**Your usual transportation mode:**

- |                               |                                             |
|-------------------------------|---------------------------------------------|
| <input type="radio"/> On foot | <input type="radio"/> Car                   |
| <input type="radio"/> Bike    | <input type="radio"/> Public transportation |

## Nature perception

### What do you value most during your leisure time?

Rank options from the most (1) to the least (6) important

|                                      | 1                     | 2                     | 3                     | 4                     | 5                     | 6                     |
|--------------------------------------|-----------------------|-----------------------|-----------------------|-----------------------|-----------------------|-----------------------|
| Sports practice                      | <input type="radio"/> | <input type="radio"/> | <input type="radio"/> | <input type="radio"/> | <input type="radio"/> | <input type="radio"/> |
| Change of air                        | <input type="radio"/> | <input type="radio"/> | <input type="radio"/> | <input type="radio"/> | <input type="radio"/> | <input type="radio"/> |
| Contact with nature                  | <input type="radio"/> | <input type="radio"/> | <input type="radio"/> | <input type="radio"/> | <input type="radio"/> | <input type="radio"/> |
| Touring the region                   | <input type="radio"/> | <input type="radio"/> | <input type="radio"/> | <input type="radio"/> | <input type="radio"/> | <input type="radio"/> |
| Calm                                 | <input type="radio"/> | <input type="radio"/> | <input type="radio"/> | <input type="radio"/> | <input type="radio"/> | <input type="radio"/> |
| Other (specify) <input type="text"/> | <input type="radio"/> | <input type="radio"/> | <input type="radio"/> | <input type="radio"/> | <input type="radio"/> | <input type="radio"/> |

### What are your criteria to choose a trip destination?

Rank options from the most (1) to the least (7) important

|                                                               | 1                     | 2                     | 3                     | 4                     | 5                     | 6                     | 7                     |
|---------------------------------------------------------------|-----------------------|-----------------------|-----------------------|-----------------------|-----------------------|-----------------------|-----------------------|
| A particular landscape                                        | <input type="radio"/> | <input type="radio"/> | <input type="radio"/> | <input type="radio"/> | <input type="radio"/> | <input type="radio"/> | <input type="radio"/> |
| Remoteness from urban and urban-associated nuisance           | <input type="radio"/> | <input type="radio"/> | <input type="radio"/> | <input type="radio"/> | <input type="radio"/> | <input type="radio"/> | <input type="radio"/> |
| A nice panorama                                               | <input type="radio"/> | <input type="radio"/> | <input type="radio"/> | <input type="radio"/> | <input type="radio"/> | <input type="radio"/> | <input type="radio"/> |
| A particular landscape or geological feature (e.g. waterfall) | <input type="radio"/> | <input type="radio"/> | <input type="radio"/> | <input type="radio"/> | <input type="radio"/> | <input type="radio"/> | <input type="radio"/> |
| A well-preserved nature, regardless the landscape             | <input type="radio"/> | <input type="radio"/> | <input type="radio"/> | <input type="radio"/> | <input type="radio"/> | <input type="radio"/> | <input type="radio"/> |
| Proximity                                                     | <input type="radio"/> | <input type="radio"/> | <input type="radio"/> | <input type="radio"/> | <input type="radio"/> | <input type="radio"/> | <input type="radio"/> |
| Other (specify) <input type="text"/>                          | <input type="radio"/> | <input type="radio"/> | <input type="radio"/> | <input type="radio"/> | <input type="radio"/> | <input type="radio"/> | <input type="radio"/> |

### Picture credits (next page)

<http://www.espacebelledonne.fr/>

<http://www.lametro.fr/>

<http://www.isere-tourisme.com/>

<http://www.futura-sciences.com/>

<http://www.landscape-photo.net/>

<http://www.altituderando.com/>

<https://www.isere.fr/> (document: *Les chemins du paysage : un outil de connaissance des territoires de l'Isère*)

## What kind of landscape do you look for?

Urban and peri-urban ☐

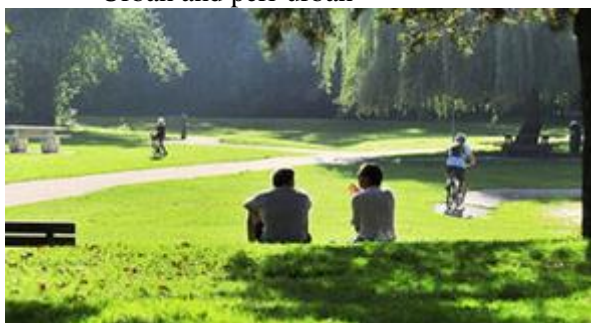

Mountain villages ☐

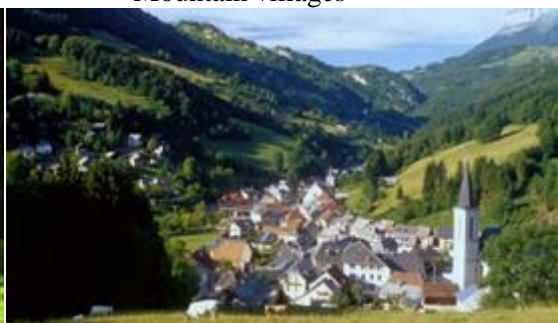

Agricultural mosaics ☐

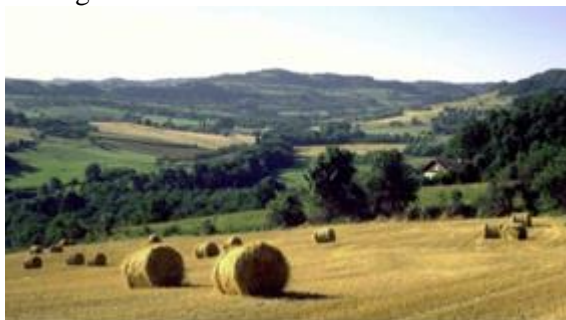

Openfield ☐

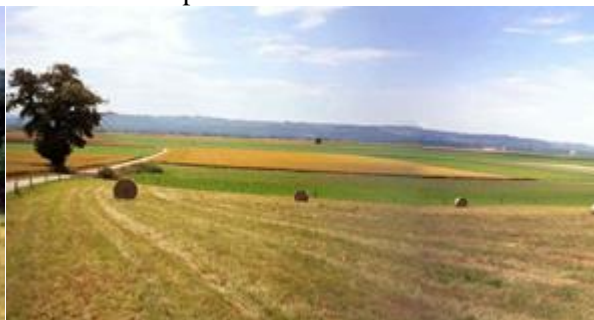

Broadleaved forest ☐

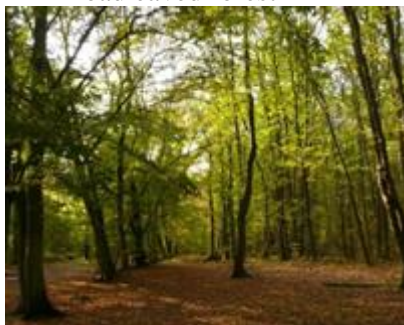

Needleleaved forest ☐

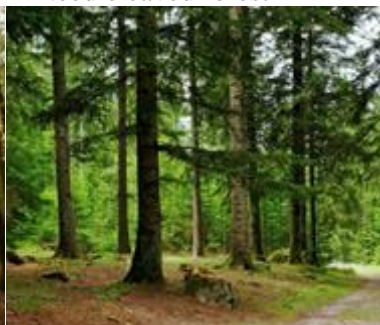

Mixed forests ☐

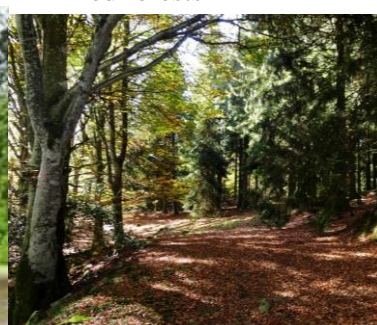

Grasslands ☐

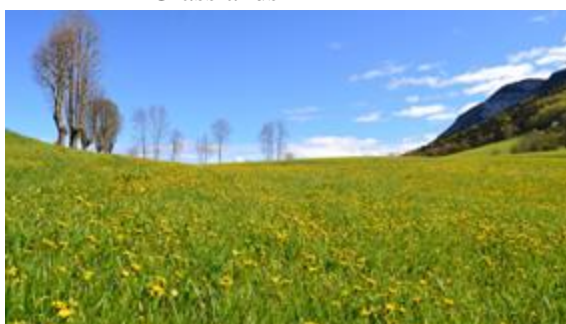

Waterscapes (lakes, swamps, rivers) ☐

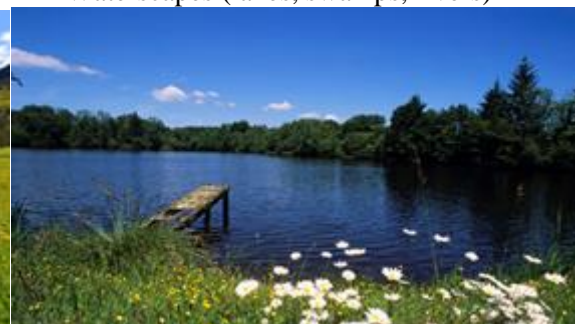

High mountain ☐

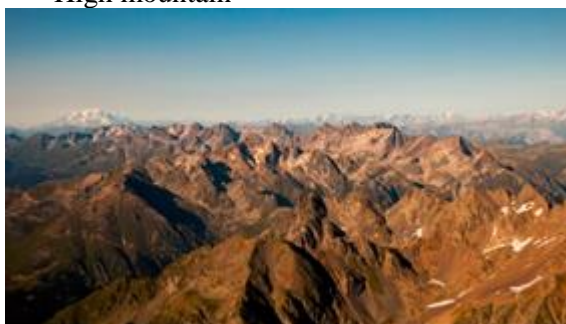

Lower mountain ☐

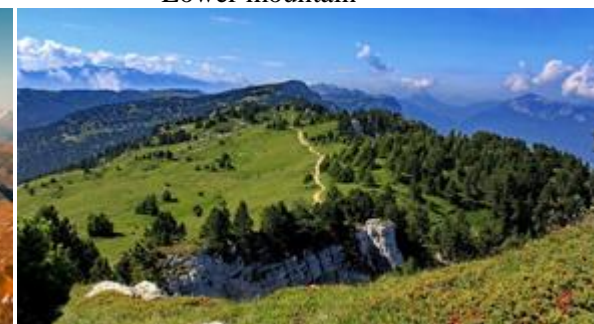

### What are the main benefits you retrieve from your time out?

- ☐ Aesthetic: enjoyment of the scenery
- ☐ Educational: learnings derived from the observation and study of the surrounding nature and landscape
- ☐ Physical, psychological: feeling of good physical and/or mental health
- ☐ Recreational: pleasure derived from relaxation or any leisure activity
- ☐ Social: pleasure derived from social exchange
- ☐ Spiritual: sentiment religieux, de sacré, ou de cohérence avec l'univers
- ☐ Cultural: 'sense of place' associated with the presence of symbolic, traditional or historical elements
- ☐ Inspirational : impressions likely to generate immediate or ulterior artistic creation

### What factors could influence your intensity of practice?

|                                        |                                                             | Increase              | Decrease              | Neutral               |
|----------------------------------------|-------------------------------------------------------------|-----------------------|-----------------------|-----------------------|
| Evolution of touristic infra-structure | Creation of a leisure center (Center Parc Chambaran)        | <input type="radio"/> | <input type="radio"/> | <input type="radio"/> |
|                                        | Creation of a national park (PNR Belledonne, PNR Chambaran) | <input type="radio"/> | <input type="radio"/> | <input type="radio"/> |
|                                        | Suppression of a ski resort (Sept Laux, Collet d'Allevard)  | <input type="radio"/> | <input type="radio"/> | <input type="radio"/> |
|                                        | Urban sprawl                                                | <input type="radio"/> | <input type="radio"/> | <input type="radio"/> |
| Major landscape change                 | Forest extension                                            | <input type="radio"/> | <input type="radio"/> | <input type="radio"/> |
|                                        | Increase of agricultural mosaics                            | <input type="radio"/> | <input type="radio"/> | <input type="radio"/> |
|                                        | Increased visitation                                        | <input type="radio"/> | <input type="radio"/> | <input type="radio"/> |
|                                        | Site degradation (pollution, lack of care)                  | <input type="radio"/> | <input type="radio"/> | <input type="radio"/> |
| Access                                 | Restricted or paid access                                   | <input type="radio"/> | <input type="radio"/> | <input type="radio"/> |
|                                        | Decreased or suppressed public transportation               | <input type="radio"/> | <input type="radio"/> | <input type="radio"/> |
|                                        | New road access to mountain ranges                          | <input type="radio"/> | <input type="radio"/> | <input type="radio"/> |
|                                        | Increased public transportation (e.g. cable)                | <input type="radio"/> | <input type="radio"/> | <input type="radio"/> |
| Other (specify)                        | <input type="text"/>                                        |                       |                       |                       |



## Map

Please select districts you visit for outdoor leisure. Multiple choices are accepted.

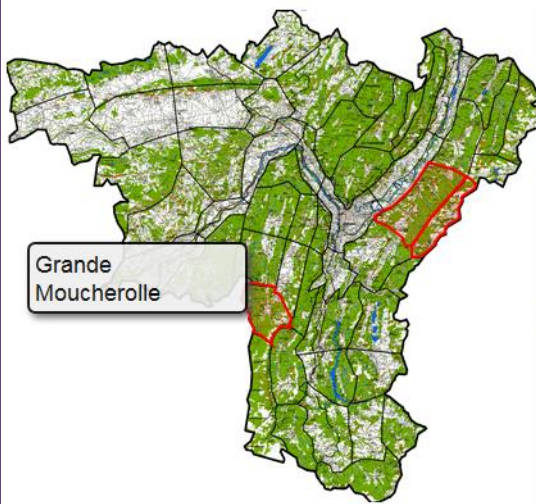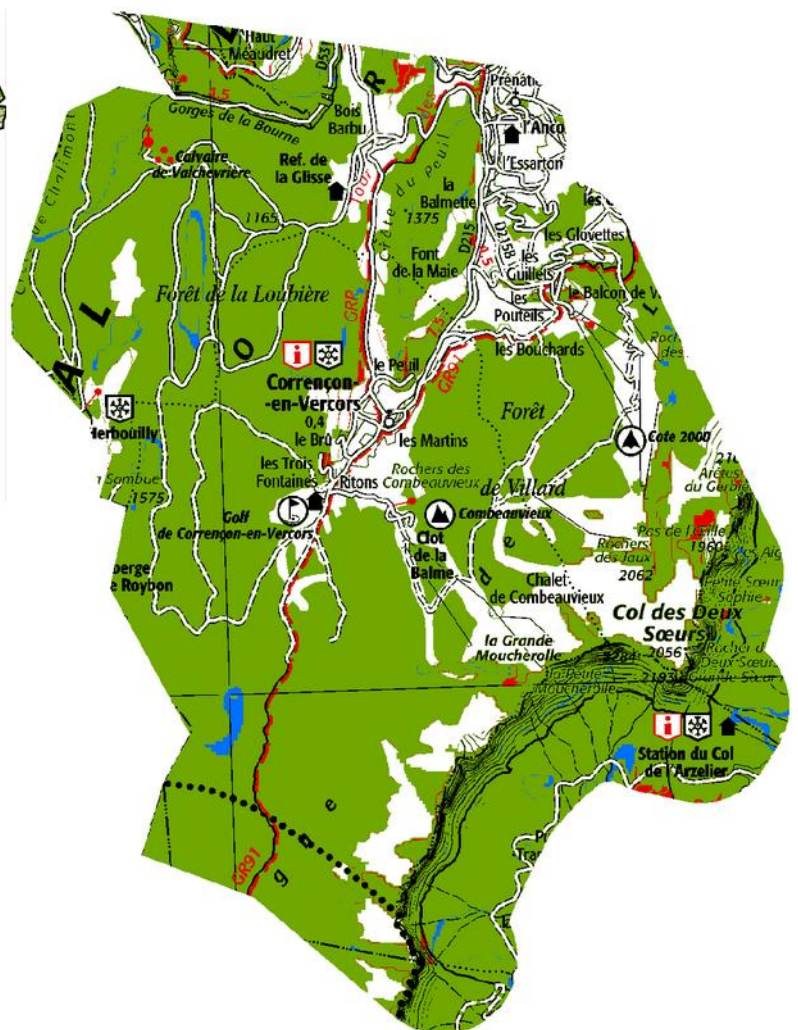

Supplement: S9 (10.1371/journal.pone.0202645.s009) [file journal.pone.0202645.s009]
